# Supplementary material for: Protein synthesis levels are increased in a subset of individuals with fragile X syndrome
Source: PubMed Central journal article supplement — Hum Mol Genet. 2018 Mar 24;27(12):2039–51. doi: 10.1093/hmg/ddy099 (PMC5985734; doi:10.1093/hmg/ddy099), 2018-03-24
Supplement: ddy099_suppl.pdf [file ddy099_suppl.pdf]

**Supplementary material for:**

**Protein synthesis levels are increased in a subset of individuals with Fragile X syndrome**

Sébastien Jacquemont, Laura Pacini, Aia E. Jønch, Giulia Cencelli, Izabela Rozenberg, Yunsheng He, Laura D'Andrea, Giorgia Pedini, Marwa Eldeeb, Rob Willemsen, Fabrizio Gasparini, Flora Tassone, Randi Hagerman, Baltazar Gomez-Mancilla and Claudia Bagni.

**Contents**

**Supplementary Figures:**

**Figure S1.** Global protein synthesis and FMRP levels in human fibroblasts, mouse primary neurons and embryonic fibroblasts (MEFs).

**Figure S2.** *De novo* protein synthesis in multiple culture passages.

**Supplementary Tables:**

**Table S1.** Cohort Demographic information.

**Table S2.** *FMRI* mutation category, *FMRI* mRNA and FMRP expression levels.

**Table S3.** Clinical assessments in the Lausanne and Sacramento (MIND) cohorts.

**Supplementary Figures**

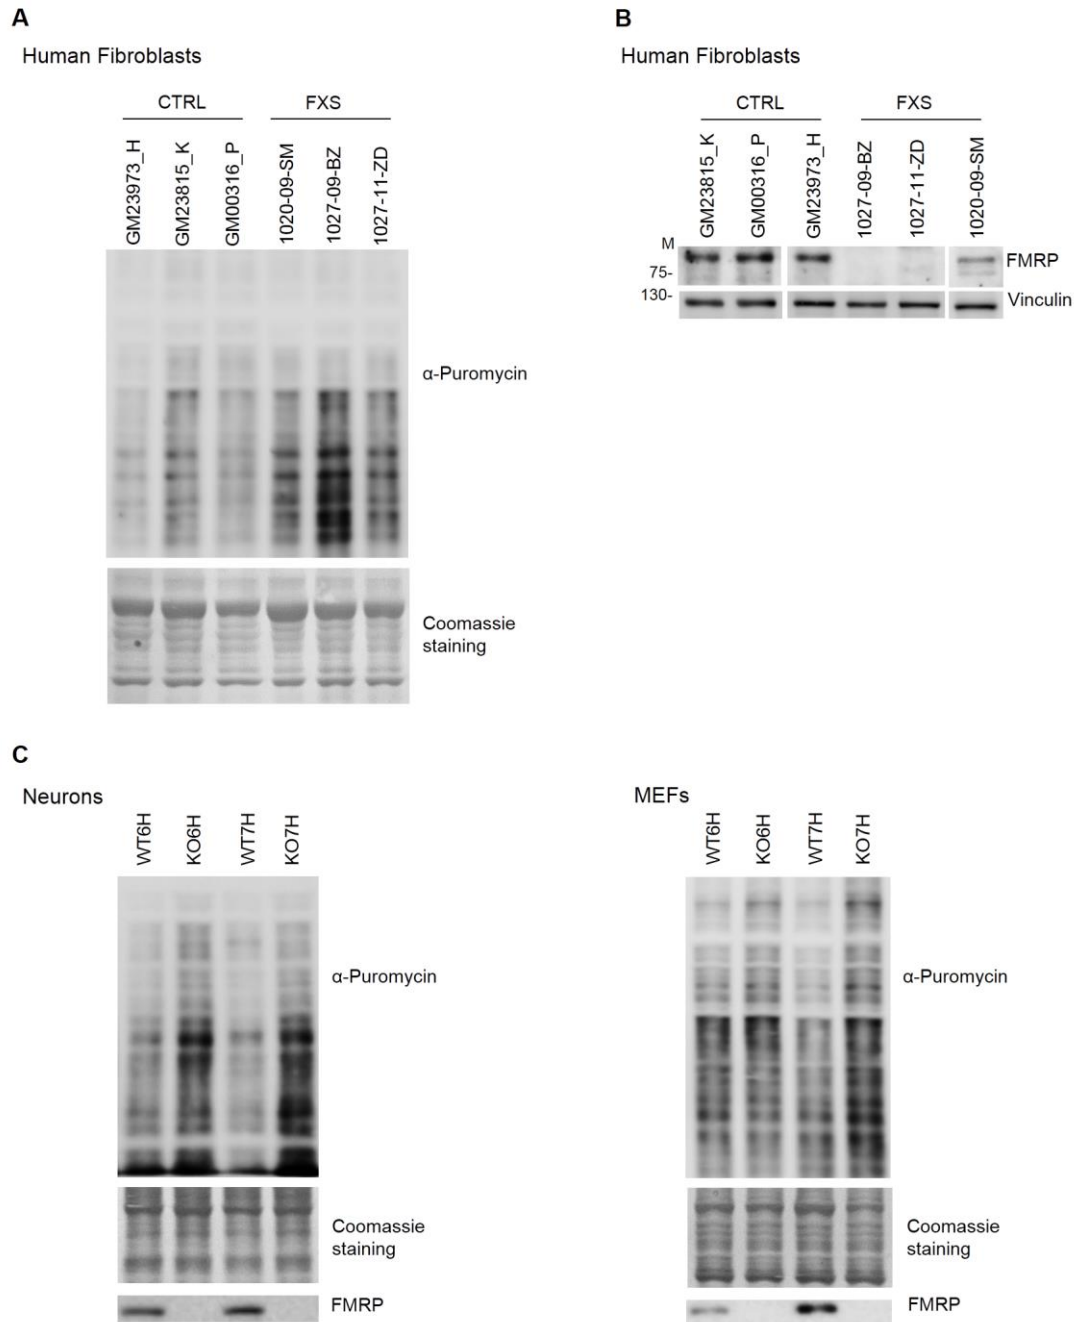

**Figure S1. Global protein synthesis and FMRP levels in human fibroblasts, mouse primary neurons and embryonic fibroblasts (MEFs).** **A)** Representative western blot showing puromycin incorporation and coomassie staining in control and FXS human fibroblasts. Puromycin incorporation in newly synthesized proteins was quantified by Western blot using an anti-Puromycin Antibody (SUnSET method, see Materials and Methods). **B)** FMRP levels in human fibroblasts. Representative Western blot showing FMRP and

Vinculin in control and FXS human fibroblasts. C) Representative Western blot showing puromycin incorporation, FMRP and coomassie staining in primary cortical neurons and in MEFs, WT and *Fmr1* KO derived from the same animal.

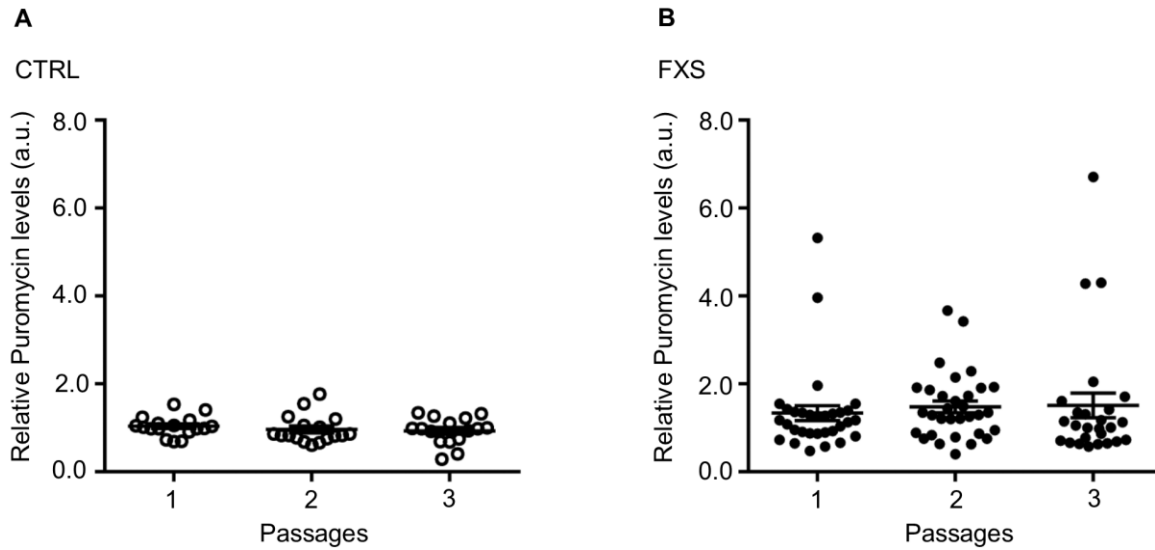

**Figure S2. *De novo* protein synthesis in multiple culture passages.**

Puromycin level measures for cell passage 1, 2 and 3 in controls **A**) and FXS **B**). Each dot represents the average of at least two technical replicates per individual. The bars represent the SEM,  $P = 0.40$  non-parametric ANOVA (WT  $n = 17$ ),  $P = 0.31$  non-parametric ANOVA (FXS  $n = 32$ ).

**Supplementary Tables****Table S1: Cohort Demographic information.**

|                                    | Participants with Fragile X         |                                           |                                            | Controls*<br>(n = 17) |
|------------------------------------|-------------------------------------|-------------------------------------------|--------------------------------------------|-----------------------|
|                                    | CHUV Lausanne<br>(n = 12)<br>(FXS1) | Erasmus MC<br>Rotterdam<br>(n = 7) (FXS2) | MIND Institute<br>Davis (n = 13)<br>(FXS3) |                       |
| <b>Age (year)</b>                  |                                     |                                           |                                            |                       |
| Mean (SD)                          | 26.0 (9.8)                          | 21.0 (11.4)                               | 28.2 (16.4)                                | 23.7 (13.6)           |
| Median                             | 26.0                                | 22.0                                      | 24.0                                       | 19.0                  |
| Rang                               | 12 to 38                            | 6 to 37                                   | 12 to 69                                   | 10 to 50              |
| <b>Sex, n (%)</b>                  |                                     |                                           |                                            |                       |
| males / females                    | 12/0                                | 7/0                                       | 13/0                                       | 14/2/1**              |
| <b>FXS diagnosis</b>               |                                     |                                           |                                            |                       |
| Full mutation, non-mosaic, n (%)   | 8 (66.7)                            | 5 (71.4)                                  | 4 (30.7)                                   | 0                     |
| Full mutation, mosaic, n (%)       | 4 (33.3)                            | 2 (28.6)                                  | 9 (69.3)                                   | 0                     |
| <b>Vineland§</b>                   |                                     |                                           |                                            |                       |
| <i>Communication domain</i>        |                                     |                                           |                                            |                       |
| Mean (SD)                          | 79.2 (15.3)                         | NA                                        | 56.3 (27.2)                                | NA                    |
| Range                              | 54 to 110                           | NA                                        | 21 to 93                                   | NA                    |
| <i>Daily living skills domain</i>  |                                     |                                           |                                            |                       |
| Mean (SD)                          | 114 (17.9)                          | NA                                        | 55.3 (23.6)                                | NA                    |
| Range                              | 75 to 136                           | NA                                        | 23 to 79                                   | NA                    |
| <i>Socialization skills domain</i> |                                     |                                           |                                            |                       |
| Mean (SD)                          | 84.58 (13.4)                        | NA                                        | 59.9 (22.6)                                | NA                    |
| Range                              | 66 to 102                           | NA                                        | 20 to 88                                   | NA                    |
| <i>Adaptive behavior composite</i> |                                     |                                           |                                            |                       |
| Mean (SD)                          | 40.83 (25.9)                        | NA                                        | 54.8 (23.9)                                | NA                    |
| Range                              | 20 to 117                           | NA                                        | 20 to 77                                   | NA                    |
| <i>Motor skills domain</i>         |                                     |                                           |                                            |                       |
| Mean (SD)                          | 67.42 (5.7)                         | NA                                        | NA                                         | NA                    |
| Range                              | 54 to 72                            | NA                                        | NA                                         | NA                    |
| <b>IQ</b>                          |                                     |                                           |                                            |                       |
| Full scale IQ (FSIQ)               |                                     |                                           |                                            |                       |
| Mean (SD)                          | 4.5 (1.1) ***                       | NA                                        | 63.8 (19.3)                                | NA                    |
| Range                              | 2.5 to 6.7 ***                      | NA                                        | 40 to 117                                  | NA                    |
| Verbal IQ (VIQ)                    |                                     |                                           |                                            |                       |
| Mean (SD)                          | NA                                  | NA                                        | 65.6 (18.5)                                | NA                    |
| Range                              | NA                                  | NA                                        | 42 to 113                                  | NA                    |

|                      |    |    |             |    |
|----------------------|----|----|-------------|----|
| Non-verbal IQ (NVIQ) |    |    |             |    |
| Mean (SD)            | NA | NA | 66.9 (19.5) | NA |
| Rang                 | NA | NA | 43 to 121   | NA |

\*Control fibroblasts came from the following companies or laboratories: CliniScience (<http://www.clinisciencences.com/>), Coriell (<https://catalog.coriell.org/>) and Lonza (<http://www.lonza.com/>).

\*\* For one control the gender is unknown.

\*\*\* Developmental age was based on the scores of the Wechsler nonverbal scale; WPPSI, Wechsler preschool and primary scale of intelligence.

§ Vineland was available for 12/12 and 9/13 from the Lausanne and MIND Institute cohorts respectively.

**Table S2: *FMRI* mutation category, *FMRI* mRNA and FMRP expression levels.**

|                          | <i>ID</i>   | <i>FMRI</i> mutation status | <i>FMRI</i> CGG repeated size <sup>1</sup> | % Meth | <i>FMRI</i> mRNA <sup>2</sup> | Std. Error | FMRP <sup>3</sup> | Std. Error |
|--------------------------|-------------|-----------------------------|--------------------------------------------|--------|-------------------------------|------------|-------------------|------------|
| Lausanne Hospital Cohort | NV00001     | Full mutation               | 340, 720, 1020                             | 100%   | n.d                           | -          | 0,48              | 0,20       |
|                          | NV00002     | Mosaic                      | 240, 300, 1150 (124)                       | >95%   | 0,208                         | 0,012      | 0,48              | 0,24       |
|                          | NV00005     | Full mutation               | 310, 995                                   | -      | 0,087                         | 0,005      | 0,40              | 0,27       |
|                          | NV00006     | Full mutation               | 750                                        | -      | -                             | -          | 0,13              | 0,02       |
|                          | NV00008     | Mosaic                      | 260, 510, 770,1030 (121)                   | >95%   | 0,138                         | 0,059      | 0,29              | 0,05       |
|                          | NV00009     | Full mutation               | 370, 1060                                  | -      | n.d                           | -          | 0,23              | 0,07       |
|                          | NV00010     | Full mutation               | 345, 540, 700                              | 100%   | 0,001                         | 0,000      | 0,15              | 0,07       |
|                          | NV00012     | Mosaic                      | 240, 300 (185)                             | >95%   | 0,075                         | 0,005      | 0,12              | 0,01       |
|                          | NV00013     | Full mutation               | 450, 570                                   | -      | -                             | -          | 0,08              | 0,06       |
|                          | NV00014     | Full mutation               | 330, 575                                   | -      | 0,068                         | 0,025      | 0,22              | 0,04       |
|                          | NV00017     | Mosaic                      | 350, 740, 1020 (133)                       | >95%   | 0,005                         | 0,001      | 0,29              | 0,05       |
|                          | NV00019     | Full mutation               | 250, 640                                   | 100%   | 0,086                         | 0,022      | 0,19              | 0,12       |
| MIND Institute Cohort    | 1001-10-BZ  | Mosaic                      | 390, 490, 950, 1140 (160-230)              | 94%    | 0,216                         | 0,072      | 0,39              | 0,09       |
|                          | 1017-09-MR  | Mosaic                      | 190, 220, 400, 500, 800 (65)               | 49%    | 0,537                         | 0,003      | 0,80              | 0,11       |
|                          | 1022-10-ER  | Mosaic                      | 235, 350, 650 (smear)                      | 82%    | 0,247                         | 0,015      | 0,50              | 0,05       |
|                          | 1043-10-SS  | Full mutation               | 290, 540, 790 (light smear)                | 100%   | 0,466                         | 0,083      | 0,36              | 0,05       |
|                          | 1055-10-TG  | Mosaic                      | 255 (260-380)                              | 12%    | 1,365                         | 0,014      | 1,03              | 0,15       |
|                          | TS114-12-KB | Mosaic                      | 230, 330 (30-200)                          | 18%    | 1,422                         | 0,186      | 0,94              | 0,33       |
|                          | 1020-09-SM  | Mosaic                      | 180 (200-270)                              | 16%    | 2,212                         | 0,076      | 0,85              | 0,07       |
|                          | 1027-09-BZ  | Full mutation               | 510, 590, 670, 810                         | 100%   | 0,270                         | 0,021      | 0,37              | 0,19       |
|                          | 1027-11-ZD  | Full mutation               | 370                                        | 100%   | 0,005                         | 0,001      | 0,34              | 0,10       |

|                             |              |                                     |                         |      |       |       |      |      |
|-----------------------------|--------------|-------------------------------------|-------------------------|------|-------|-------|------|------|
|                             | 1032-10-SF   | Mosaic                              | 200 (250-760)           | 21%  | 2,130 | 0,194 | 0,40 | 0,06 |
|                             | 1035-09-LD   | Mosaic                              | 290 (200-250)           | 78%  | 0,353 | 0,001 | 0,97 | 0,24 |
|                             | 1060-10-GK   | Mosaic                              | 425, 580, 680 (210-280) | 79%  | 0,358 | 0,001 | 0,42 | 0,06 |
|                             | TS106-13-JS  | Full mutation                       | 500, 820, 960           | 100% | 0,037 | 0,001 | 0,48 | 0,17 |
| Rotterdam University Cohort | 81E0152      | Full mutation                       | 490, 730                | 100% | 0,034 | 0,036 | 0,27 | 0,07 |
|                             | 92E0198      | Fragile X syndrome <sup>#</sup>     | > 200                   | >95% | 0,214 | 0,001 | 0,38 | 0,07 |
|                             | 84E0275      | Full mutation                       | 500                     | 100% | 0,001 | 0,001 | 0,46 | 0,12 |
|                             | 86E0633      | Mosaic                              | 240 (30-330)            | <5%  | 2,888 | 0,006 | 1,09 | 0,25 |
|                             | 86E1377      | Mosaic                              | 410 (smear)             | >95% | 0,017 | 0,001 | 0,32 | 0,06 |
|                             | 94E0363      | Fragile X Syndrome <sup>&amp;</sup> | > 200                   | >95% | 0,067 | 0,003 | 0,48 | 0,11 |
|                             | 86E0681      | Fragile X Syndrome <sup>§</sup>     | > 200                   | -    | 0,001 | 0,000 | 0,43 | 0,10 |
| Control Cohort              | 449121 (FB1) | CTRL                                | -                       | -    | 0,953 | 0,046 | 0,94 | 0,09 |
|                             | 448766 (FB2) | CTRL                                | -                       | -    | 1,332 | 0,190 | 0,72 | 0,27 |
|                             | 321585 (FB7) | CTRL                                | -                       | -    | 1,090 | 0,129 | 0,95 | 0,21 |
|                             | GM00316-P    | CTRL                                | -                       | -    | 0,755 | 0,020 | 1,18 | 0,11 |
|                             | GM00500_J    | CTRL                                | -                       | -    | 1,265 | 0,090 | 1,44 | 0,16 |
|                             | GM02037-A    | CTRL                                | -                       | -    | 0,893 | 0,015 | 1,43 | 0,17 |
|                             | GM02673_E    | CTRL                                | -                       | -    | 0,914 | 0,054 | 1,18 | 0,10 |
|                             | GM03349-D    | CTRL                                | -                       | -    | 0,642 | 0,095 | 1,13 | 0,09 |
|                             | GM07753-E    | CTRL                                | -                       | -    | 1,220 | 0,179 | 0,70 | 0,12 |
|                             | GM09503_C    | CTRL                                | -                       | -    | 1,101 | 0,061 | 1,73 | 0,25 |

|  |           |      |   |   |       |       |      |      |
|--|-----------|------|---|---|-------|-------|------|------|
|  | GM23815_K | CTRL | - | - | 0,886 | 0,009 | 2,07 | 0,16 |
|  | GM23971_D | CTRL | - | - | 0,669 | 0,092 | 1,60 | 0,59 |
|  | GM23973_H | CTRL | - | - | 1,075 | 0,088 | 1,53 | 0,23 |
|  | GM01864_G | CTRL | - | - | 1,467 | 0,080 | 2,62 | 0,28 |
|  | GM23976_O | CTRL | - | - | 0,645 | 0,025 | 1,32 | 0,18 |
|  | HDF       | CTRL | - | - | 1,063 | 0,248 | 0,90 | 0,19 |
|  | L         | CTRL | - | - | -     | -     | 1,01 | 0,09 |

<sup>1</sup>Determined by Southern blot and PCR or/and standard karyotyping; numbers between parentheses indicate unmethylated alleles. <sup>2</sup>Determined by RT-qPCR; <sup>3</sup>Determined by Western blotting, where 0,4 has to be considered the baseline.

Abbreviations: CTRL, controls; (-), not available; n.d, not detected; % Meth, methylation percentage; *FMRI*, fragile X mental retardation 1; mRNA, messenger RNA; Std. Error, Standard Error.

# Initially determined cytogenetically as Fragile X sample; during the revision process the sample was re-analyzed by Southern blotting and PCR confirming the presence of a full mutation allele in addition to a normal allele of 25 CGG repeats. Methylation status > 95%.

& Initially determined cytogenetically as Fragile X sample; during the revision process the sample was re-analyzed by Southern blotting and PCR confirming the presence of a full mutation allele in addition to a broad spectrum of unmethylated alleles present in less than 5% of the cells. Methylation status > 95%.

\$ Determined cytogenetically as Fragile X sample.



**Table S3: Clinical assessments in the Lausanne and Sacramento (MIND) cohorts.**

| Cohort            | ID          | FMR1 mutation status | Sex | Age | ASD (Y/N) | IQ   |     |      | Mental age | IQ test | Vineland |     |     |     |    |
|-------------------|-------------|----------------------|-----|-----|-----------|------|-----|------|------------|---------|----------|-----|-----|-----|----|
|                   |             |                      |     |     |           | FSIQ | VIQ | NVIQ |            |         | Co       | DL  | S   | AB  | MS |
| Lausanne Cohort   | NV00001     | Full                 | M   | 38  |           | -    | -   | -    | 3.6        | S-B     | 75       | 113 | 80  | 30  | 71 |
|                   | NV00002     | Mosaic               | M   | 35  |           | -    | -   | -    | 4.9        | S-B     | 91       | 124 | 102 | 39  | 70 |
|                   | NV00005     | Full                 | M   | 38  |           | -    | -   | -    | 4.9        | S-B     | 80       | 136 | 87  | 38  | 72 |
|                   | NV00006     | Full                 | M   | 22  |           | -    | -   | -    | 3.6        | S-B     | 58       | 88  | 68  | 20  | 54 |
|                   | NV00008     | Mosaic               | M   | 23  |           | -    | -   | -    | 6.8        | S-B     | 81       | 125 | 97  | 36  | 70 |
|                   | NV00009     | Full                 | M   | 30  |           | -    | -   | -    | 6.4        | S-B     | 89       | 136 | 102 | 42  | 72 |
|                   | NV00010     | Full                 | M   | 37  |           | -    | -   | -    | 4.1        | S-B     | 69       | 107 | 71  | 24  | 70 |
|                   | NV00012     | Mosaic               | M   | 17  |           | -    | -   | -    | 4.5        | S-B     | 110      | 119 | 86  | 40  | 61 |
|                   | NV00013     | Full                 | M   | 13  |           | -    | -   | -    | 3.7        | S-B     | 54       | 75  | 75  | 28  | 69 |
|                   | NV00014     | Full                 | M   | 18  |           | -    | -   | -    | 6.4        | S-B     | 91       | 119 | 80  | 117 | 66 |
|                   | NV00017     | Mosaic               | M   | 12  |           | -    | -   | -    | 4.7        | S-B     | 78       | 118 | 101 | 54  | 72 |
| NV00019           | Full        | M                    | 29  |     | -         | -    | -   | 4.2  | S-B        | 74      | 108      | 66  | 22  | 62  |    |
| Sacramento Cohort | 1055-10-TG  | Mosaic               | M   | 12  | Y         | 63   | 73  | 56   | -          | S-B     | -        | -   | -   | -   | -  |
|                   | 1001-10-BZ  | Mosaic               | M   | 13  | Y         | 73   | 75  | 75   | -          | WPPSI-3 | 70       | 58  | 59  | 61  | -  |
|                   | TS114-12-KB | Mosaic               | M   | 15  | N         | 66   | 68  | 68   | -          | S-B     | 67       | 79  | 75  | 72  | -  |
|                   | 1022-10-ER  | Mosaic               | M   | 22  | Y         | 61   | 61  | 69   | -          | WAIS 3  | 66       | 65  | 71  | 65  | -  |
|                   | 1017-09-MR  | Mosaic               | M   | 21  | N         | 79   | 83  | 78   | -          | WAIS 3  | 69       | 69  | 80  | 71  | -  |
|                   | 1043-10-SS  | Full                 | M   | 23  | Y         | 51   | 56  | 55   | -          | WAIS 3  | 23       | 25  | 46  | 29  | -  |
|                   | TS106-13-JS | Full                 | M   | 25  | -         | 54   | 62  | 51   | -          | S-B     | -        | -   | -   | -   | -  |
|                   | 1020-09-SM  | Mosaic               | M   | 24  | N         | 117  | 113 | 121  | -          | WAIS 3  | 93       | 76  | 67  | 76  | -  |
|                   | 1027-11-ZD  | Full                 | M   | 27  | Y         | 53   | 46  | 64   | -          | S-B     | 21       | 27  | 33  | 22  | -  |
|                   | 1060-10-GK  | Mosaic               | M   | 29  | Y         | 45   | 48  | 49   | -          | WAIS 3  | 21       | 23  | 20  | 20  | -  |
|                   | 1027-09-BZ  | Full                 | M   | 32  | -         | 63   | 63  | 69   | -          | WAIS 3  | 77       | 76  | 88  | 77  | -  |

Jacquemont *et al.*

|  |            |        |   |    |   |    |    |    |   |           |   |   |   |   |   |
|--|------------|--------|---|----|---|----|----|----|---|-----------|---|---|---|---|---|
|  | 1032-10-SF | Mosaic | M | 55 | - | 64 | 63 | 72 | - | WAIS<br>3 | - | - | - | - | - |
|  | 1035-09-LD | Mosaic | M | 69 | Y | 40 | 42 | 43 | - | S-B       | - | - | - | - | - |

Abbreviations: IQ, intelligence quotient; FSIQ, full scale IQ; VIQ, verbal IQ; NVIQ, Non-verbal IQ; Vineland (Co, communication domain; DL, daily living skills domain; S, socialization domain; AB, adaptive behavior; MS, motor skills domain; S-B, Stanford–Binet Intelligence Scales; WPPSI 3, Wechsler Preschool and Primary Scale of Intelligence; (-), not available; Y/N, yes/no
